# Supplementary material
Source: PubMed Central journal article supplement (PMC5626015)

| ColV $\alpha 1$ Peptide | Sequence         | Fragment | Specificity      |
|-------------------------|------------------|----------|------------------|
| p629                    | DRGFDGLAGLPGEKG  | 1        | DR1              |
| p799                    | GIRGLKGTKGEKGED  | 2        | DR1, DR15        |
| p1049                   | KDGPPGLRGFPGDRG  | 4        | DR15             |
| p1439                   | LRGIPGPVGEQGLPG  | 6        | DR1, DR15        |
|                         |                  |          |                  |
| p599                    | PPGPAGKPGRRRGRAG | 1        | DQ2, DQ6, I-A(b) |
| p909                    | RGQRGPTGPRGERGP  | 3        | DQ2, DQ6, I-A(b) |

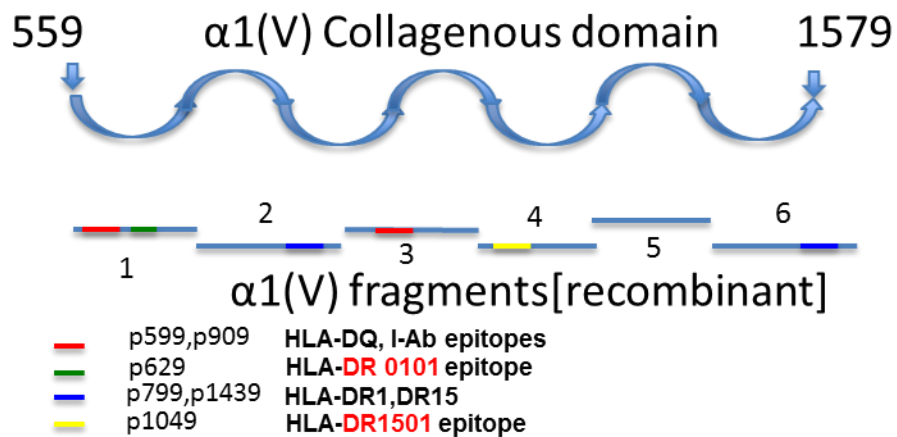

Supplement: NIHMS827209-supplement-Supp_Fig_S2.pdf [file NIHMS827209-supplement-Supp_Fig_S2.pdf]
