# Supplementary material
Source: PubMed Central journal article supplement (PMC5626015)

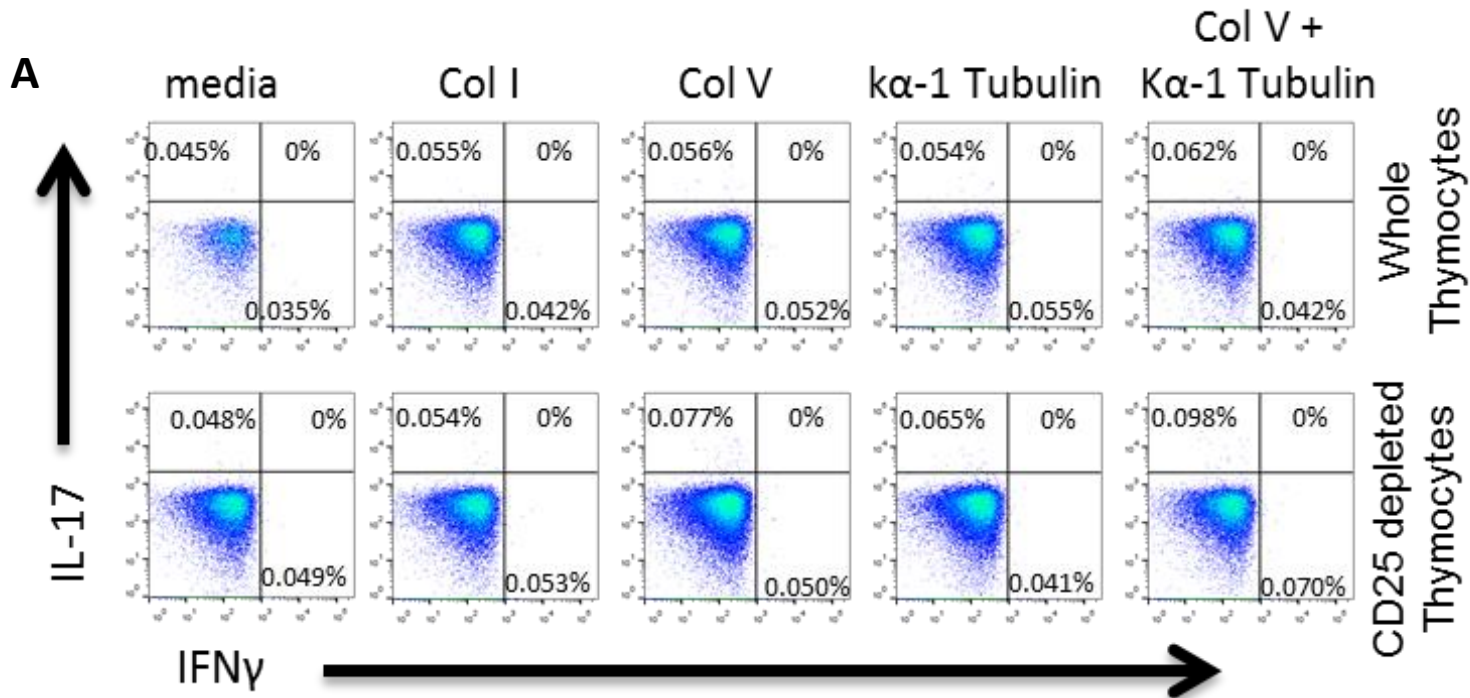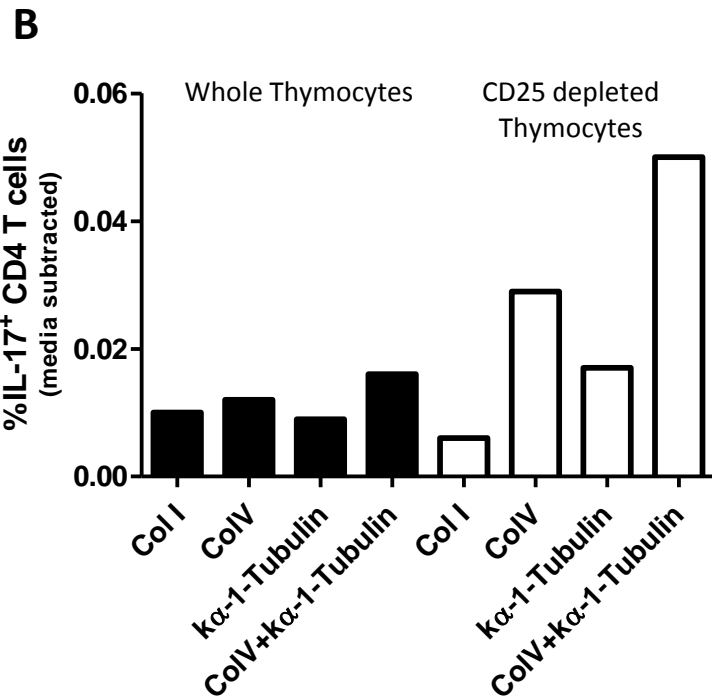

Supplement: NIHMS827209-supplement-Supp_Fig_S1.pdf [file NIHMS827209-supplement-Supp_Fig_S1.pdf]
